# Supplementary material for: De Novo Assembly and Annotation of the Vaginal Metatranscriptome Associated with Bacterial Vaginosis
Source: MDPI journal article supplement (doi:10.3390/ijms23031621), 2022-01-30
Supplement: s1 [file s1]

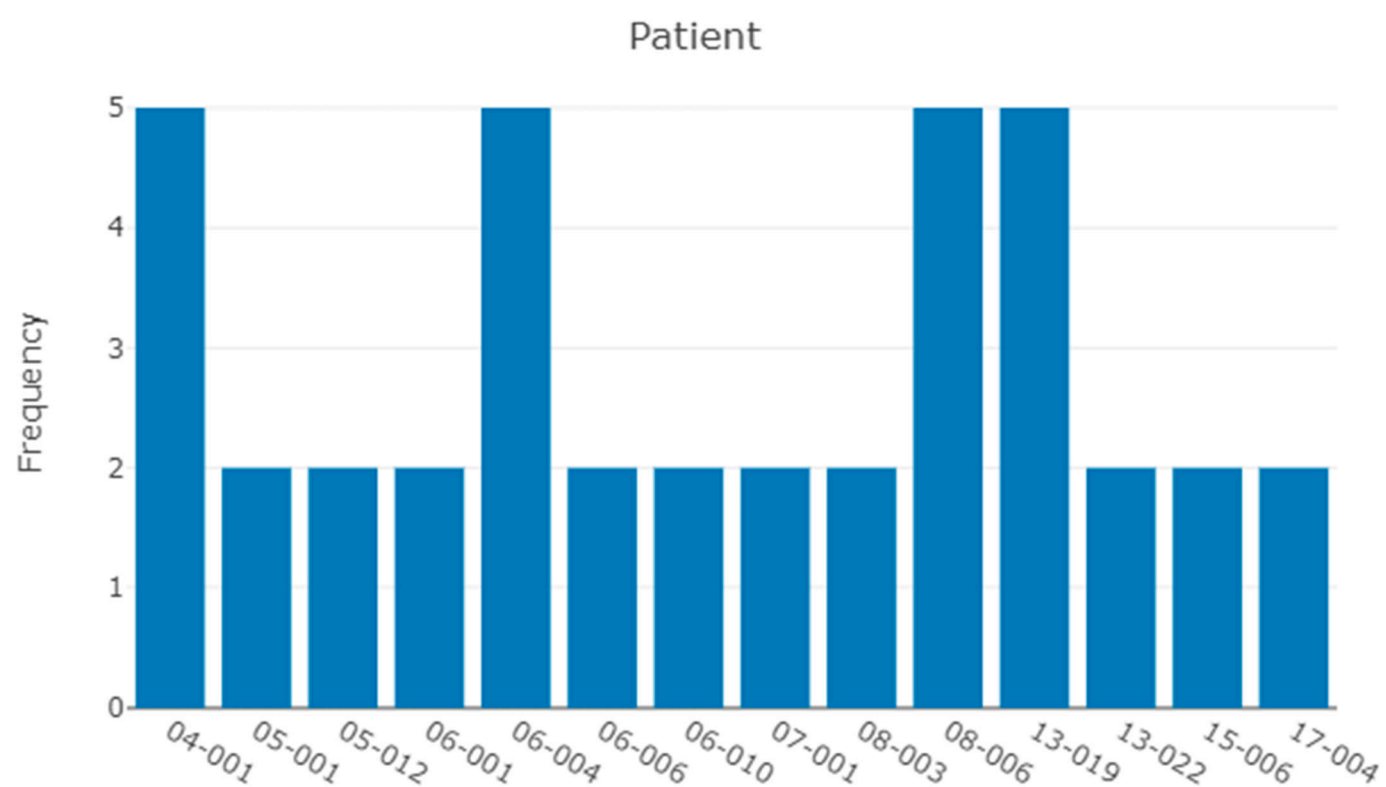

**Figure S1.** Number of vaginal samples collected from each of 14 patients.

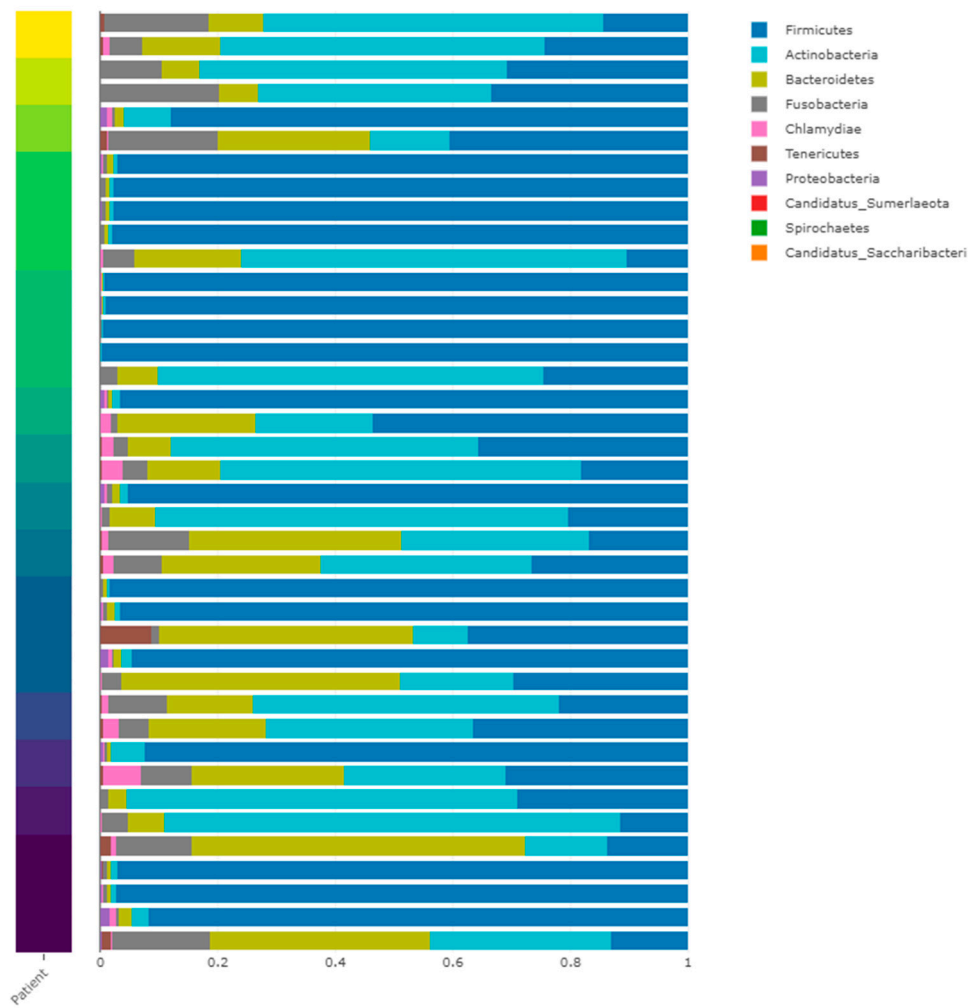

**Figure S2.** Relative abundance of identified bacteria in 40 different samples at phylum level.

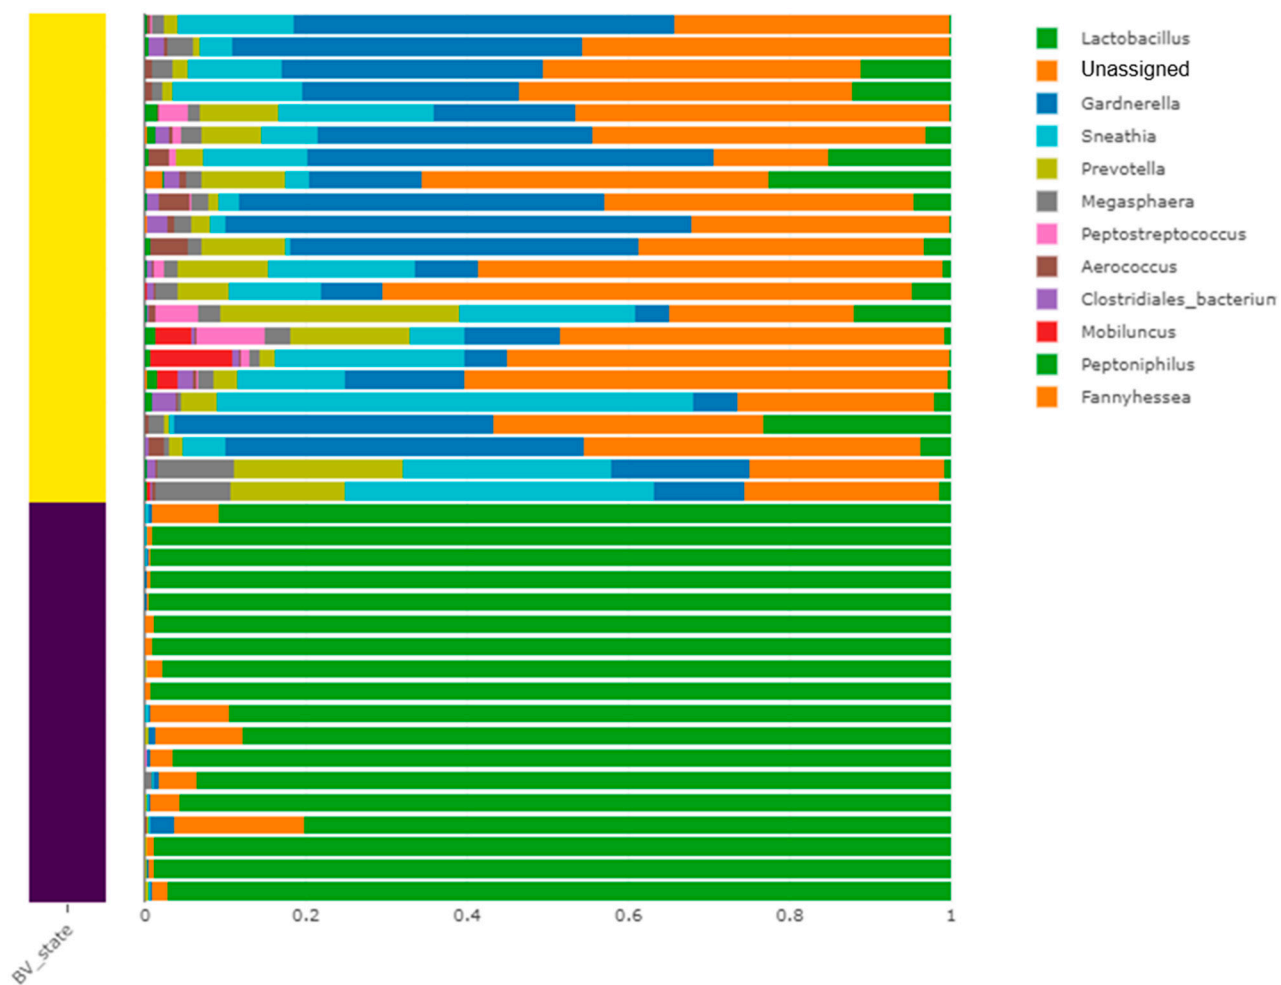

**Figure S3.** Relative abundance of 176 bins in 40 different samples at genus level. Yellow and purple bars indicate positive and negative samples for BV state, respectively.

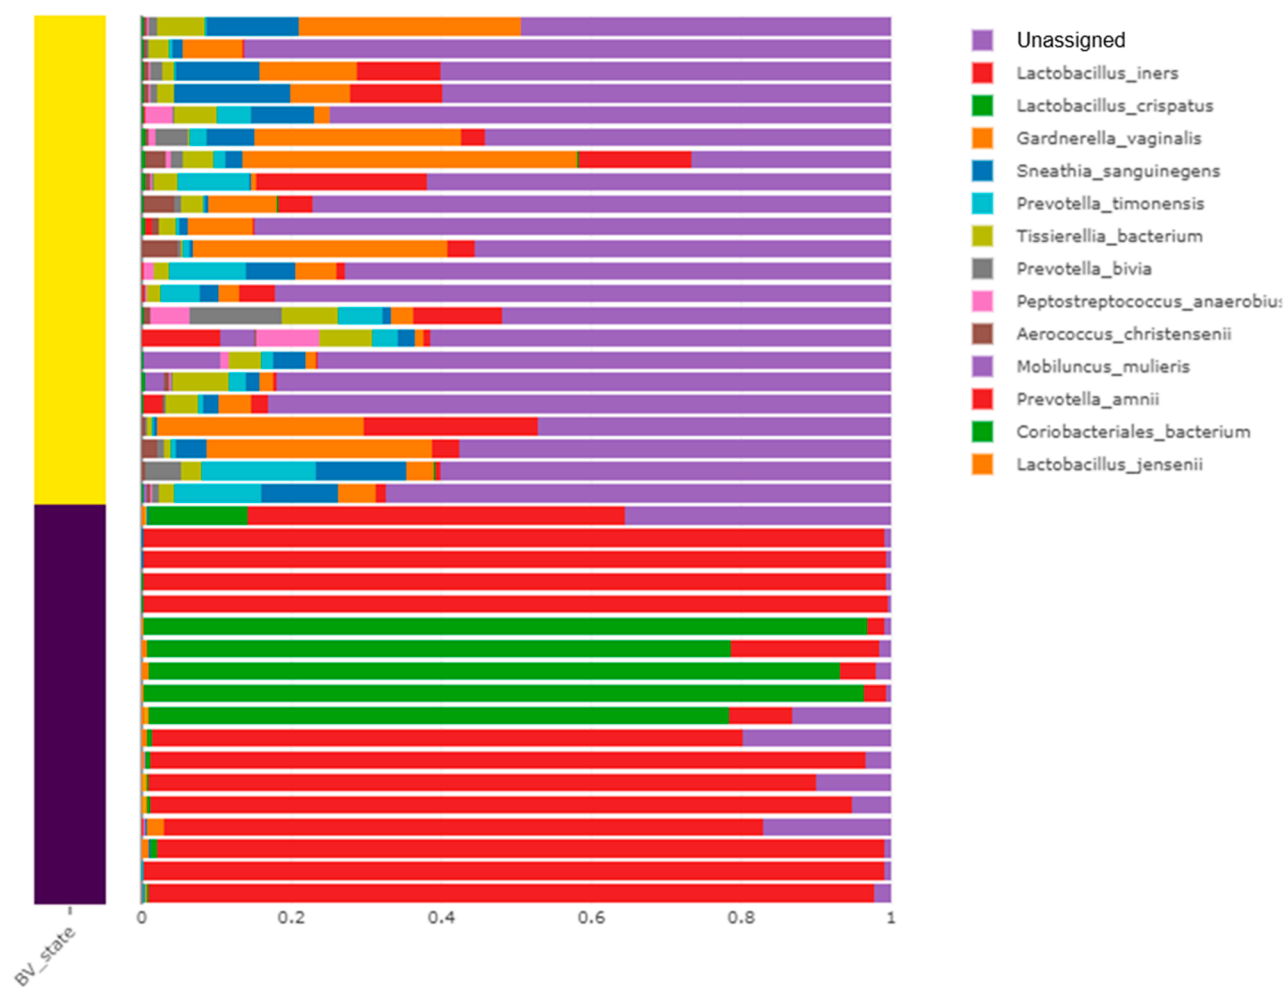

**Figure S4.** Relative abundance of 176 bins in 40 different samples at species level. Yellow and purple bars indicate positive and negative samples for BV state, respectively.

---

133 species 16S rRNA

metaT-Kraken 103 species

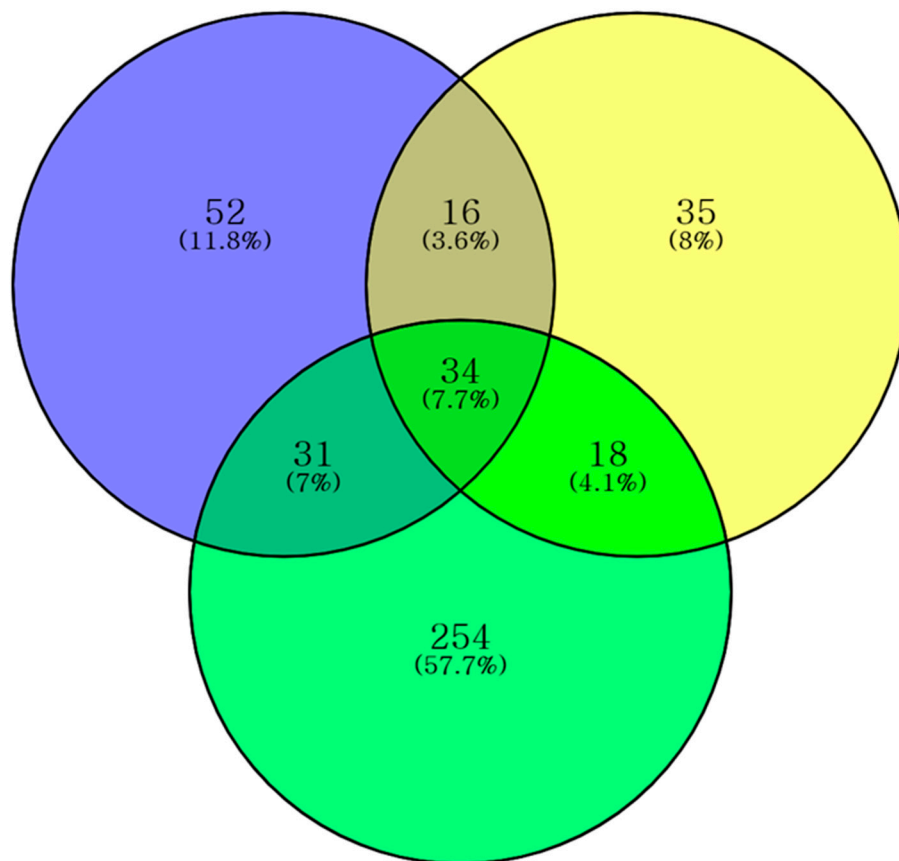

metaT-Assembly 337 species

**Figure S5.** Comparison of number of identified bacterial species from three different studies.

16S rRNA indicates the previous study using 16S rRNA amplicon sequencing from 96 samples. metaT-Kraken indicates the previous study using metatranscriptomic data from 40 samples using Kraken. metaT-Assembly indicates this study using metatranscriptomic data from 40 samples using de novo transcriptome assembly followed by BLASTX search against an NR protein database.
